# Supplementary material for: Efficacy of Favipiravir (T-705) in Rabies Postexposure Prophylaxis
Source: PubMed Central journal article supplement — J Infect Dis. 2015 Dec 9;213(8):1253–61. doi: 10.1093/infdis/jiv586 (PMC4799667; doi:10.1093/infdis/jiv586), 2015-12-09
Supplement: supp_jiv586_jiv586supp_table1.pdf [file supp_jiv586_jiv586supp_table1.pdf]

## Supplementary Table 1

**Supplementary Table 1.** The day of symptom onset in 1088-infected mice received the post-exposure T-705 administration for 7 days.

| Treatment                      | n | The day of symptom onset (mean $\pm$ SD) |
|--------------------------------|---|------------------------------------------|
| 0.5% methylcellulose (control) | 8 | 8.25 $\pm$ 1.17                          |
| T-705: 30 mg/kg/day            | 8 | 10.00 $\pm$ 1.60                         |
| T-705: 100 mg/kg/day           | 6 | 9.83 $\pm$ 1.33                          |
| T-705: 300 mg/kg/day           | 4 | 11.75 $\pm$ 3.30                         |

The data were extracted from Figure 3.

A significant difference was only detected between the control and 300 mg T-705/kg/day groups ( $P < 0.05$ , Tukey's multiple comparisons test).
