# Supplementary material for: Efficacy of Favipiravir (T-705) in Rabies Postexposure Prophylaxis
Source: PubMed Central journal article supplement — J Infect Dis. 2015 Dec 9;213(8):1253–61. doi: 10.1093/infdis/jiv586 (PMC4799667; doi:10.1093/infdis/jiv586), 2015-12-09
Supplement: supp_jiv586_jiv586supp_table2.pdf [file supp_jiv586_jiv586supp_table2.pdf]

## Supplementary Table 2

**Supplementary Table 2.** The day of symptom onset in 1088-infected mice received the post-exposure T-705 administration for 14 days.

| Treatment                                | n  | The day of symptom onset (mean $\pm$ SD) |
|------------------------------------------|----|------------------------------------------|
| 0.5% methylcellulose (control, Day 0–13) | 9  | 8.67 $\pm$ 1.32                          |
| T-705 (300 mg/kg/day, Days 0–13)         | 6  | 13.33 $\pm$ 3.08                         |
| T-705 (300 mg/kg/day, Days 4–17)         | 10 | 8.40 $\pm$ 0.84                          |

The data were extracted from Figure 5.

Significant differences were detected between the T-705 (Days 0–13) and control or T-705 (Days 4–17) groups ( $P < 0.01$ , Tukey's multiple comparisons test), but not between control and T-705 (Days 4–17) groups ( $P = 0.94$ ).
